# Supplementary material for: Structural transformation of h-BN overlayers on Pt(111) in oxidative atmospheres
Source: Royal Society of Chemistry journal article supplement (doi:10.1039/c8cp00877a), 2018-01-01
Supplement: c8cp00877a1.pdf [file c8cp00877a1.pdf]

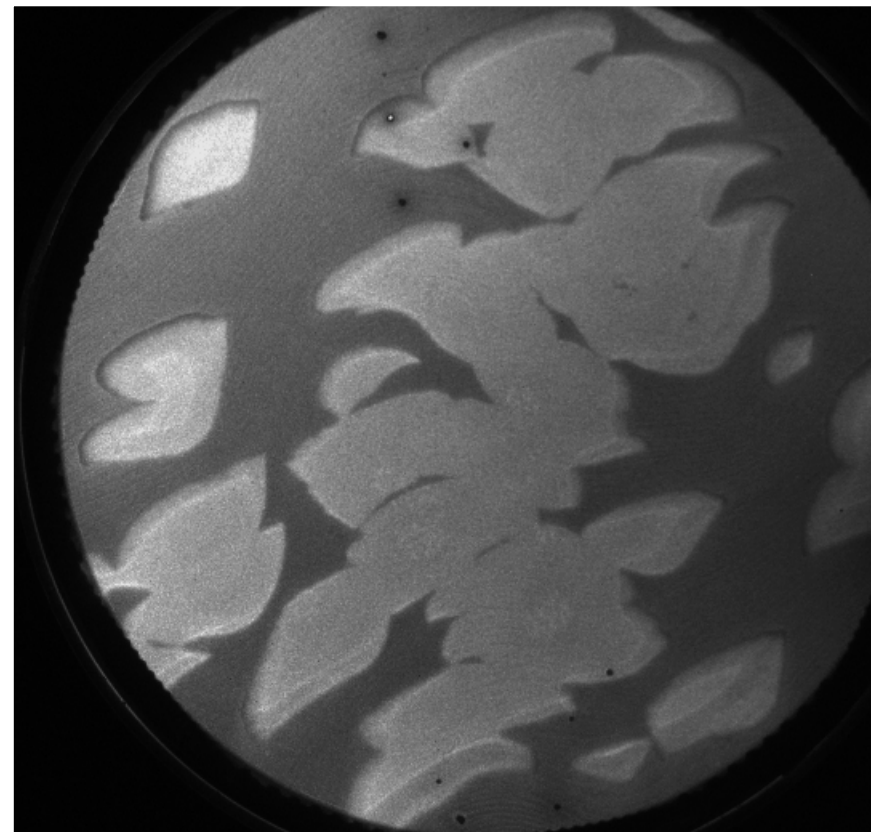

**Video S1** LEEM video of h-BN islands oxidized in O<sub>2</sub>. Oxidation conditions: temperature = 400 °C, P(O<sub>2</sub>) = 1 × 10<sup>-6</sup> Torr. Image conditions: STV = 2.0 V, FOV = 50 μm. The whole oxidation process lasted for 21min.

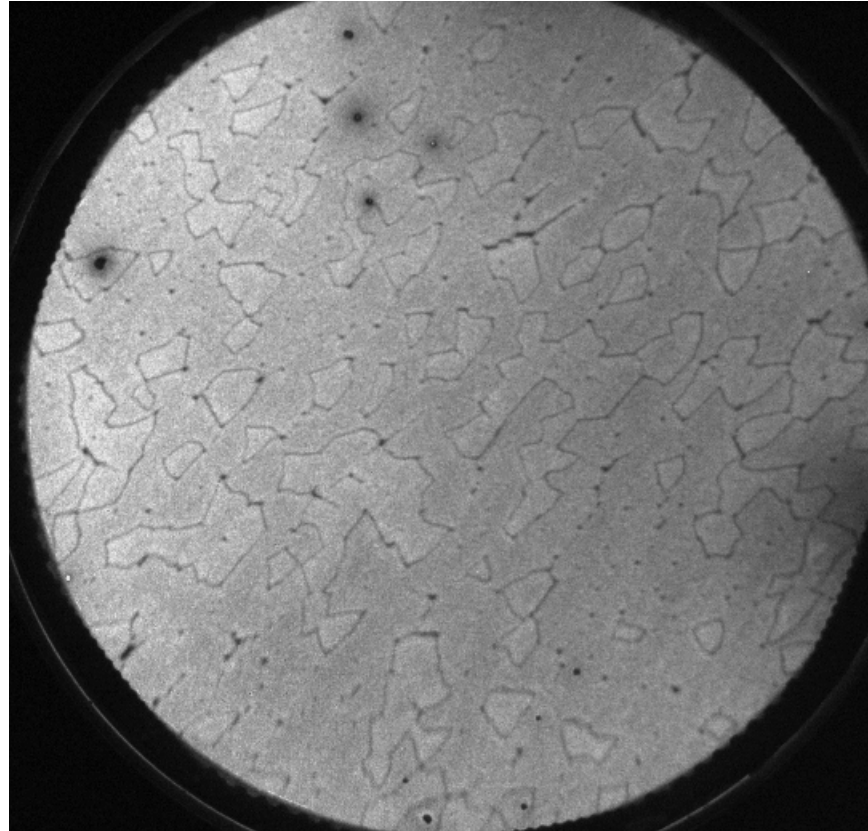

**Video S2** PEEM video of full layer h-BN intercalated in NO<sub>2</sub>.  
Intercalation conditions: temperature = 140 °C, P(NO<sub>2</sub>) =  $5 \times 10^{-7}$  Torr. Image conditions: FOV = 50 μm. The whole oxidation process lasted for 2 min 30 s.
